# Supplementary material
Source: HighWire-hosted journal article supplement (https://spcare.bmj.com/content/12/2/211)
Supplement: inline-supplementary-material-1 [file inline-supplementary-material-1.pdf]

**Table S1.** Palliative Care Screening Tool (PCST).

| Screening Items                                                                                                  | Scoring                                                                                                                                                   |
|------------------------------------------------------------------------------------------------------------------|-----------------------------------------------------------------------------------------------------------------------------------------------------------|
| <b>A. Primary diseases associated with palliative care</b>                                                       | Score 2 points EACH                                                                                                                                       |
| 1. Cancer (metastatic/recurrent)                                                                                 |                                                                                                                                                           |
| 2. Severe chronic obstructive pulmonary disease (COPD)                                                           |                                                                                                                                                           |
| 3. End-stage liver disease (e.g., hepatoencephalopathy, severe ascites, gastroesophageal variceal hemorrhage)    |                                                                                                                                                           |
| 4. End-stage renal disease (age $\geq 65$ , dialysis for $>2$ years)                                             |                                                                                                                                                           |
| 5. Severe heart failure (shortness of breath at rest or orthopnea)                                               |                                                                                                                                                           |
| 6. Neurologic disease with severely reduced function (i.e. dementia, stroke, coma resulting in bedridden status) |                                                                                                                                                           |
| 7. Other life-limiting acute illness (i.e. ARDS, sepsis, multiple organ failure)                                 |                                                                                                                                                           |
| <b>B. Secondary comorbidities</b>                                                                                | Score 1 point EACH                                                                                                                                        |
| 1. Cancer (primary)                                                                                              |                                                                                                                                                           |
| 2. Moderate COPD                                                                                                 |                                                                                                                                                           |
| 3. Liver cirrhosis                                                                                               |                                                                                                                                                           |
| 4. End-stage renal disease (others)                                                                              |                                                                                                                                                           |
| 5. Moderate heart failure (Dyspnea on exertion)                                                                  |                                                                                                                                                           |
| 6. Other complex diseases (e.g., chronic wound, catastrophic illness, multiple trauma)                           |                                                                                                                                                           |
| <b>C. Functional status of patient</b>                                                                           | Score as specified                                                                                                                                        |
| Using ECOG Performance Status (Eastern Cooperative Oncology Group)                                               |                                                                                                                                                           |
| Score    Scale                                                                                                   |                                                                                                                                                           |
| 0                                                                                                                | Fully active, able to carry on all pre-disease activities without restrictions.                                                                           |
| 0                                                                                                                | Restricted in physically strenuous activity but ambulatory and able to carry out work of a light or sedentary nature, e.g., light housework, office work. |
| 1                                                                                                                | Ambulatory and capable of all self-care but unable to carry out any work activities.                                                                      |
| 2                                                                                                                | Capable of only limited self-care; confined to bed or chair                                                                                               |

3        Completely disabled. Cannot carry on any self-care.

**D. Other criteria to consider when screening the patient,  
including frequency of disease exacerbations:**

Score 1 point EACH

1. The patient/family needs help when making complex decisions and determining the goals of patient care
2. The patient suffered from intolerable pain
3. The patient had unsolved psychosocial or spiritual issues
4. The patient visited the Emergency Department more than once for the same diagnosis in the last 30 days
5. The patient was hospitalized more than once for the same diagnosis in the last 30 days
6. The patient had ever admitted into the intensive care unit during hospitalization
7. The patient was admitted into the intensive care unit with poor prognosis
8. The patients was hospitalized for more than 30 days.

Total Score: A + B + C + D=

---
